# Supplementary material for: In situ characterization of aggregates of nanoscale zero-valent iron (nZVI) in water: an engineering aspect
Source: Royal Society of Chemistry journal article supplement (doi:10.1039/d2en00373b), 2022-01-01
Supplement: d2en00373b1.pdf [file d2en00373b1.pdf]

## Electronic Supplementary Information

### **In-situ characterization of aggregates of nanoscale zero-valent iron (nZVI) in water: an engineering aspect**

Weiyi Wang<sup>1</sup>, Jianhua Li<sup>1</sup>, Shaolin Li<sup>\*1,2</sup>, Wei-xian Zhang<sup>1,2</sup>

1 State Key Laboratory for Pollution Control and Resource Reuse

College of Environmental Science and Engineering

Tongji University, 1239 Siping Road, Shanghai 200092, China

2 Shanghai Institute of Pollution Control and Ecological Security

Shanghai 200092, China

---

\*Corresponding author: Email: [lishaolin@tongji.edu.cn](mailto:lishaolin@tongji.edu.cn); Fax: 86-21-65985885.

## Table of Contents:

1. Figure captions

2. Figures

3. Table

## Figure captions

**Figure S1** (A) The cone-shaped mixing tank; (B) a schematic of the tank dimension.

**Figure S2** Principle diagram of the Turbiscan stability analyzer (A). Gravitational compression of the 50 g/L nZVI slurry in the Turbiscan vial: photo (B1) and the Turbiscan spectra in one hour (B2) and in four days (C). Change of the height of the interface during a 96-h gravitational compression: the three nZVI slurries have initial nZVI concentrations at 40, 50 and 60 g/L, respectively (D). The interface height was deduced from the Turbiscan spectra.

**Figure S3** PSDs of nZVI aggregates in aqueous solution at different mixing conditions (nZVI concentrations range from 1 ppm to 500 ppm).

**Figure S4** The raw optical images of the settling nZVI aggregates.

**Figure S5** The  $d_{\max}$ -AR plot (A) and the concentration-AR average ( $AR_{\text{ave}}$ ) plot (B) of the settling aggregates.

**Figure S6** Deduction process of eqn (11).

Figure S1

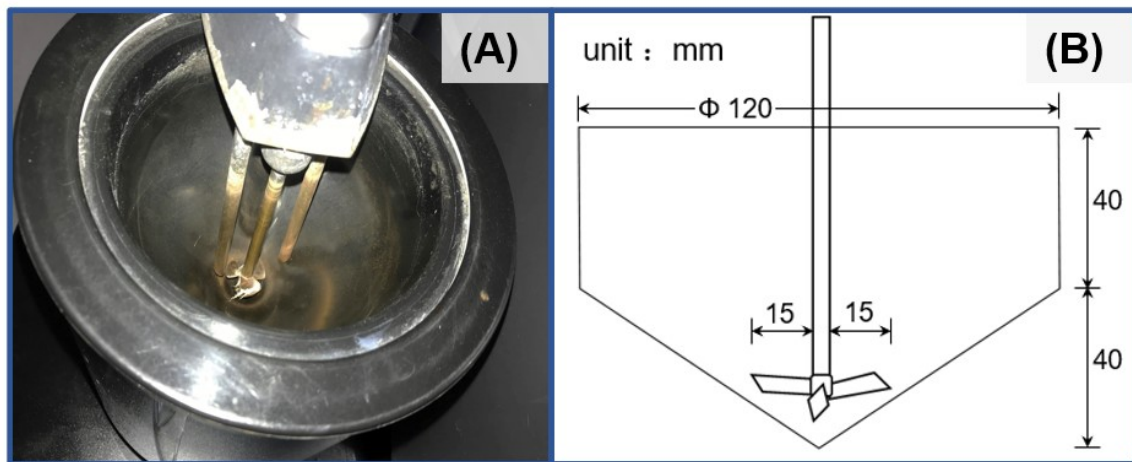

**Figure S2**

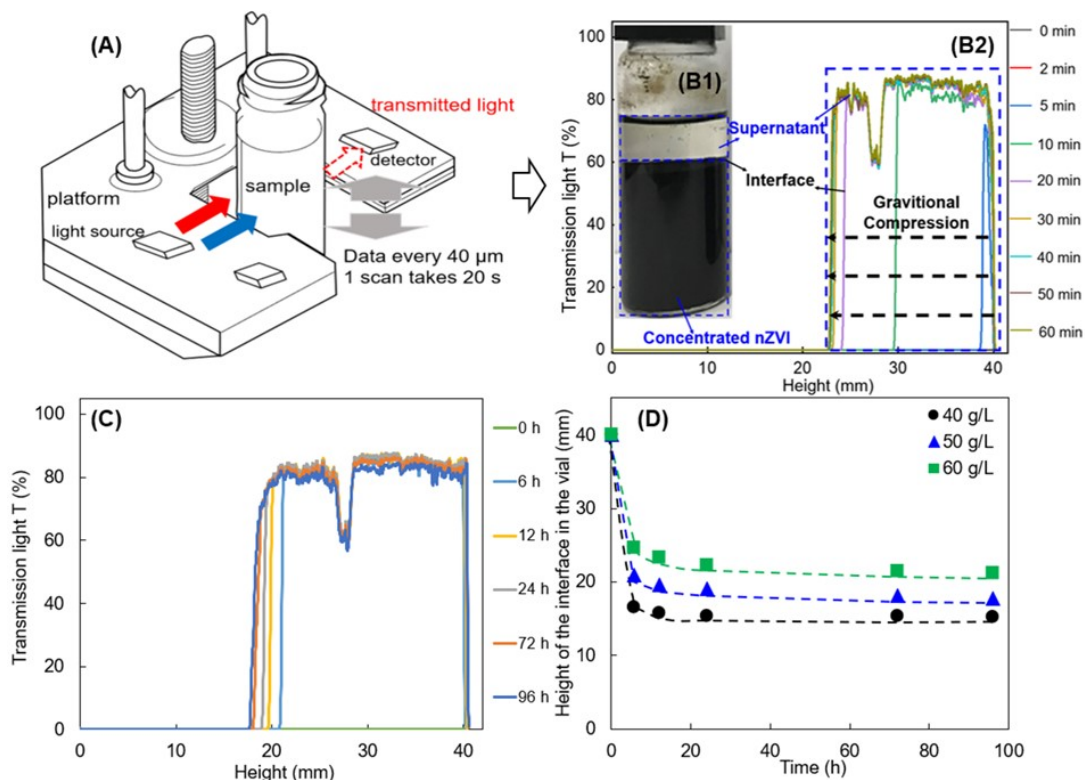

Study of the gravitational compression. nZVI aggregates during gravitational compression were studied using Turbiscan stability analyzer, of which principle is shown in Figure S2A. In brief, the stability analyzer measures the transmitted light (T, %) passing through the sample slurry in a 20-mL cylindrical glass sample vial (Figure S2A and S2B1) that has an effective height of 40 mm. In the analyzer, the vial is scanned using a moving light source ( $\lambda = 880 \text{ nm}$ ); the light passing through the slurry is recorded by a detector that moves synchronously with the light source. The light source and the detector move along the vial and one T value is acquired at every  $40 \mu\text{m}$  during the moving. One entire scan from the vial bottom to the top takes 20 s and is repeated at the preset intervals. DI water in the vial was used as

a blank, which had an average T of ~90%. Scanning temperature was set at 20 °C.

To study the gravitational compression of nZVI, a 20-mL nZVI slurry, at the nZVI concentrations of 40 g/L, 50 g/L and 60 g/L respectively, was first injected into the vial; the vial was then sonicated for 10 s and inserted into the machine. A steep T line was observed immediately after the scan started, e.g., at 10 min at the height of ~30 mm (Figure S2B2): right to the steep line was the part of high T value (~80%) that corresponded to the supernatant in the vial top; left to the steep line was the part of the zero T that corresponded to the formed concentrated nZVI at the vial bottom; the steep line corresponded to the interface between the supernatant and the concentrated nZVI. The steep line kept moving to the left (the vial bottom) during the settling: for example, the steep line of the 50 g/L slurry reached at 23 mm at 40 min (Figure S2B2) and 18 mm at 72 h (Figure S2C). This suggested that the concentrated nZVI at the bottom was shrinking in volume and the compression occurred. From the height of the steep line, volume of the concentrated nZVI was deduced and then used for the calculation of the volume per unit mass, the bulk density, and the porosity.

Figure S3

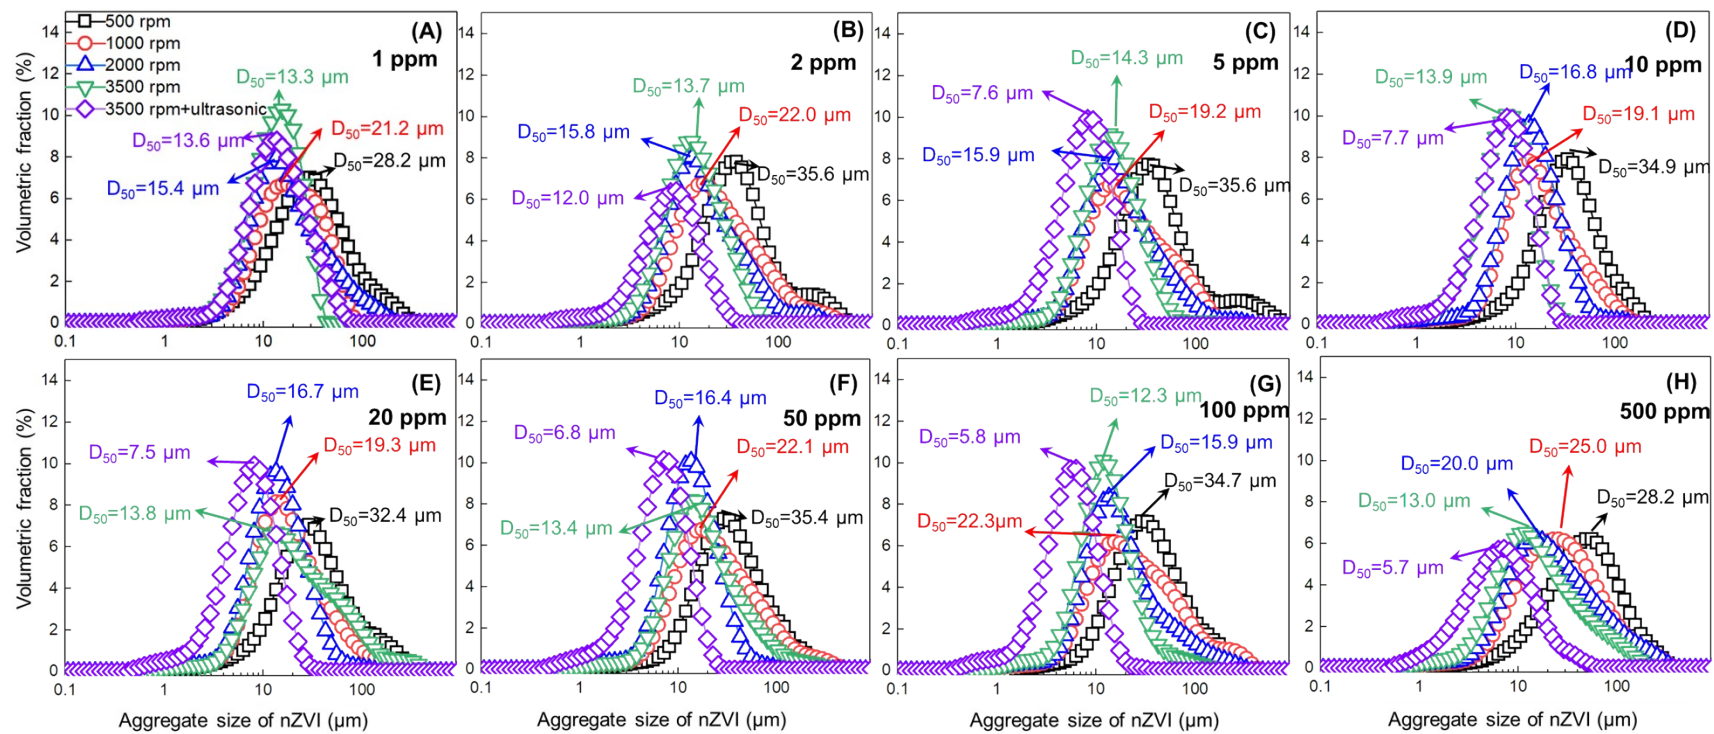

**Figure S4**

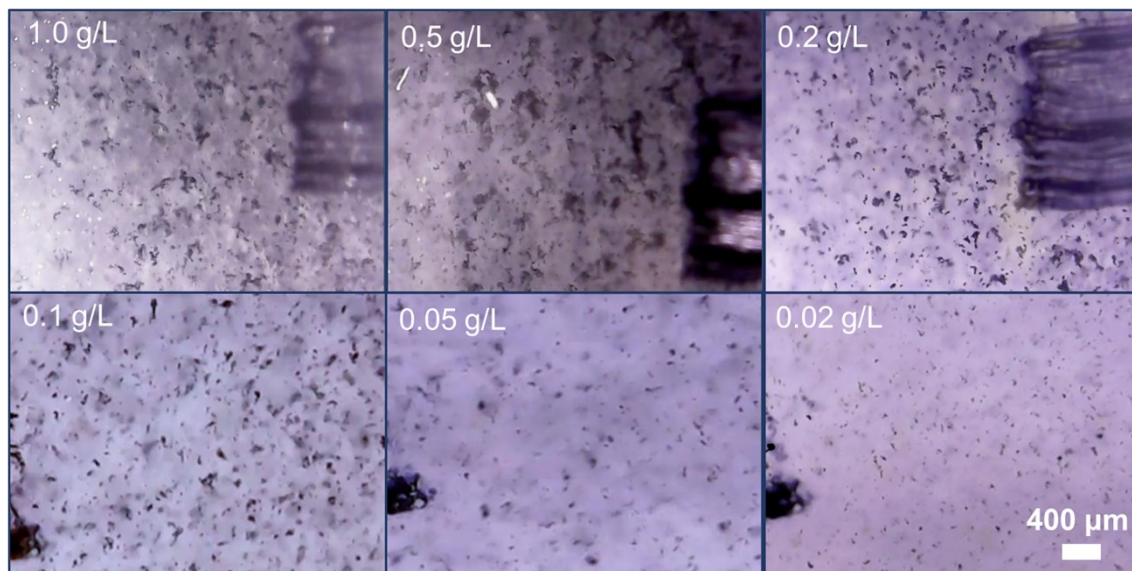



**Figure S5**

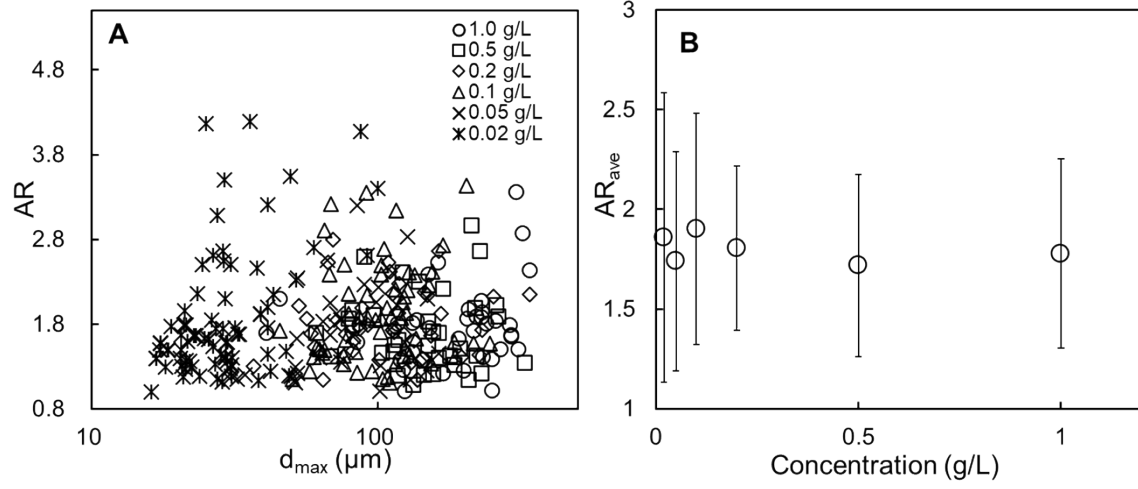

Figure S6

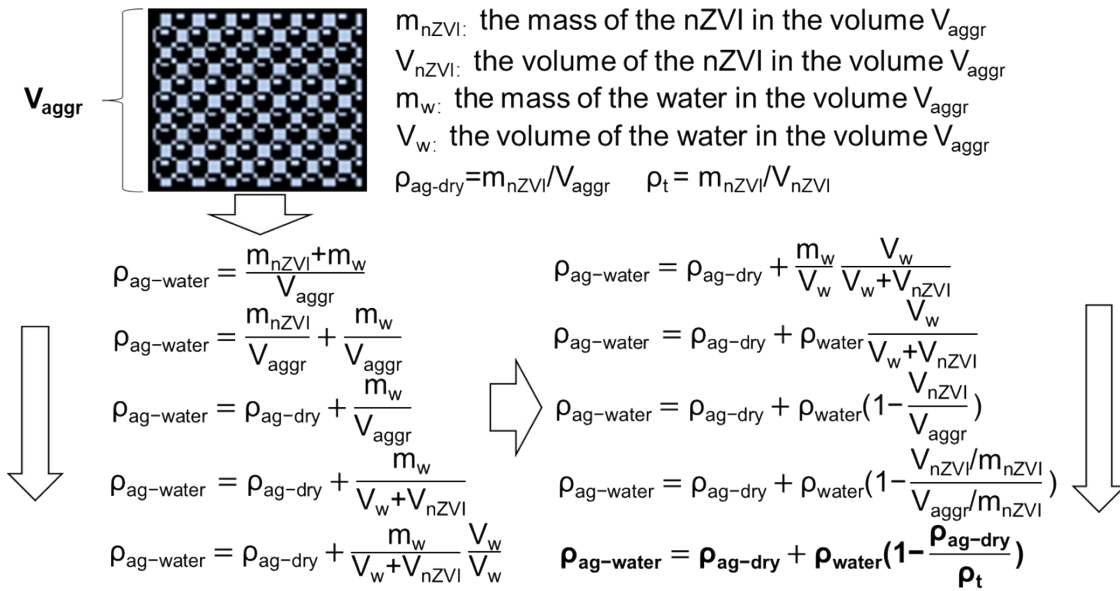

**Table S1** Solution pH at different nZVI concentrations (20 °C)

| concentration (g/L) | pH  | concentration (g/L) | pH   |
|---------------------|-----|---------------------|------|
| 0 (DI water)        | 6.9 | 1                   | 9.5  |
| 0.001               | 7.0 | 2                   | 9.9  |
| 0.002               | 7.1 | 5                   | 10.3 |
| 0.005               | 7.2 | 10                  | 10.6 |
| 0.01                | 7.4 | 20                  | 10.9 |
| 0.02                | 7.4 | 30                  | 11.0 |
| 0.05                | 7.5 | 40                  | 11.0 |
| 0.1                 | 7.6 | 50                  | 11.1 |
| 0.2                 | 8.0 | 60                  | 11.2 |
| 0.5                 | 9.1 |                     |      |

**Table S2** Raw data about the aggregate morphology and structure  
presented in Figure 5

|    | PA ( $\mu\text{m}^2$ ) | $d_{\text{max}}$ | $d_{\text{min}}$ | P    | L   | W   | AR  | SI  | $v_s$ (mm/s) |
|----|------------------------|------------------|------------------|------|-----|-----|-----|-----|--------------|
|    | (μm)                   |                  |                  |      |     |     |     |     |              |
| 1  | 27311                  | 339              | 93               | 973  | 349 | 143 | 2.4 | 0.4 |              |
| 2  | 20100                  | 321              | 80               | 803  | 322 | 112 | 2.9 | 0.4 | 0.32         |
| 3  | 29367                  | 310              | 101              | 1082 | 305 | 203 | 1.5 | 0.3 |              |
| 4  | 14100                  | 304              | 79               | 736  | 310 | 92  | 3.4 | 0.3 | 0.15         |
| 5  | 27578                  | 293              | 79               | 812  | 293 | 177 | 1.7 | 0.5 |              |
| 6  | 23989                  | 293              | 79               | 963  | 293 | 175 | 1.7 | 0.3 |              |
| 7  | 25222                  | 289              | 69               | 883  | 291 | 163 | 1.8 | 0.4 |              |
| 8  | 34297                  | 269              | 152              | 828  | 272 | 180 | 1.5 | 0.6 |              |
| 9  | 23318                  | 257              | 107              | 840  | 267 | 145 | 1.8 | 0.4 |              |
| 10 | 27744                  | 251              | 121              | 995  | 277 | 200 | 1.4 | 0.4 | 0.34         |
| 11 | 27643                  | 251              | 98               | 1086 | 268 | 263 | 1.0 | 0.3 |              |
| 12 | 19437                  | 239              | 97               | 643  | 247 | 136 | 1.8 | 0.6 | 0.28         |
| 13 | 19722                  | 233              | 88               | 678  | 218 | 154 | 1.4 | 0.5 | 0.25         |
| 14 | 16892                  | 231              | 75               | 644  | 227 | 117 | 1.9 | 0.5 | 0.17         |
| 15 | 17611                  | 230              | 79               | 661  | 236 | 125 | 1.9 | 0.5 | 0.25         |
| 16 | 16321                  | 230              | 70               | 606  | 243 | 117 | 2.1 | 0.6 | 0.26         |
| 17 | 13956                  | 221              | 24               | 705  | 240 | 127 | 1.9 | 0.4 | 0.24         |
| 18 | 14389                  | 216              | 54               | 687  | 237 | 138 | 1.7 | 0.4 | 0.18         |
| 19 | 9944                   | 208              | 61               | 690  | 212 | 107 | 2.0 | 0.3 | 0.10         |
| 20 | 9467                   | 206              | 18               | 612  | 212 | 113 | 1.9 | 0.3 | 0.16         |
| 21 | 18090                  | 199              | 107              | 607  | 195 | 156 | 1.3 | 0.6 | 0.26         |
| 22 | 13514                  | 192              | 84               | 538  | 197 | 121 | 1.6 | 0.6 | 0.14         |
| 23 | 13137                  | 169              | 85               | 541  | 166 | 136 | 1.2 | 0.6 | 0.23         |
| 24 | 6757                   | 162              | 49               | 394  | 162 | 64  | 2.5 | 0.5 | 0.16         |
| 25 | 7670                   | 152              | 62               | 429  | 151 | 86  | 1.8 | 0.5 | 0.12         |
| 26 | 6044                   | 150              | 52               | 364  | 150 | 63  | 2.4 | 0.6 | 0.18         |
| 27 | 10411                  | 144              | 94               | 379  | 145 | 105 | 1.4 | 0.9 | 0.21         |
| 28 | 5467                   | 137              | 53               | 354  | 134 | 72  | 1.8 | 0.5 | 0.17         |
| 29 | 6403                   | 132              | 31               | 392  | 132 | 73  | 1.8 | 0.5 | 0.11         |
| 30 | 10044                  | 132              | 89               | 461  | 171 | 116 | 1.5 | 0.6 | 0.11         |
| 31 | 7476                   | 124              | 65               | 418  | 116 | 115 | 1.0 | 0.5 | 0.10         |
| 32 | 9022                   | 123              | 78               | 381  | 125 | 99  | 1.3 | 0.8 | 0.15         |
| 33 | 6756                   | 120              | 70               | 313  | 121 | 88  | 1.4 | 0.9 | 0.18         |
| 34 | 5578                   | 117              | 60               | 282  | 118 | 65  | 1.8 | 0.9 | 0.13         |
| 35 | 2922                   | 84               | 34               | 254  | 91  | 57  | 1.6 | 0.6 | 0.15         |
| 36 | 1056                   | 45               | 24               | 118  | 49  | 24  | 2.1 | 1.0 | 0.12         |
| 37 | 878                    | 41               | 24               | 102  | 41  | 24  | 1.7 | 1.0 | 0.07         |
| 38 | 29176                  | 327              | 58               | 1182 | 329 | 245 | 1.3 | 0.3 | 0.06         |
| 39 | 15704                  | 265              | 46               | 780  | 265 | 141 | 1.9 | 0.3 | 0.24         |
| 40 | 14230                  | 259              | 51               | 789  | 273 | 135 | 2.0 | 0.3 | 0.12         |

|    |       |     |     |      |     |     |     |     |      |
|----|-------|-----|-----|------|-----|-----|-----|-----|------|
| 41 | 21212 | 230 | 43  | 919  | 231 | 189 | 1.2 | 0.3 | 0.27 |
| 42 | 12879 | 227 | 76  | 538  | 234 | 88  | 2.7 | 0.6 | 0.15 |
| 43 | 24590 | 221 | 124 | 652  | 234 | 163 | 1.4 | 0.7 | 0.19 |
| 44 | 18284 | 218 | 109 | 546  | 227 | 114 | 2.0 | 0.8 | 0.19 |
| 45 | 8190  | 213 | 55  | 544  | 220 | 74  | 3.0 | 0.3 | 0.19 |
| 46 | 14394 | 194 | 80  | 564  | 198 | 131 | 1.5 | 0.6 | 0.16 |
| 47 | 12223 | 185 | 57  | 575  | 183 | 139 | 1.3 | 0.5 | 0.12 |
| 48 | 16154 | 179 | 96  | 508  | 175 | 122 | 1.4 | 0.8 | 0.26 |
| 49 | 9234  | 169 | 65  | 384  | 169 | 76  | 2.2 | 0.8 | 0.05 |
| 50 | 8640  | 163 | 45  | 493  | 164 | 97  | 1.7 | 0.4 |      |
| 51 | 13042 | 163 | 94  | 455  | 166 | 118 | 1.4 | 0.8 |      |
| 52 | 9132  | 156 | 67  | 418  | 167 | 97  | 1.7 | 0.7 | 0.19 |
| 53 | 11957 | 156 | 63  | 487  | 151 | 125 | 1.2 | 0.6 | 0.12 |
| 54 | 14940 | 208 | 62  | 696  | 156 | 136 | 1.1 | 0.4 |      |
| 55 | 11056 | 150 | 73  | 465  | 153 | 83  | 1.8 | 0.6 | 0.19 |
| 56 | 6040  | 150 | 29  | 425  | 145 | 94  | 1.5 | 0.4 | 0.12 |
| 57 | 7371  | 145 | 63  | 367  | 141 | 118 | 1.2 | 0.7 | 0.07 |
| 58 | 8436  | 139 | 49  | 480  | 133 | 58  | 2.3 | 0.5 | 0.11 |
| 59 | 5487  | 133 | 51  | 304  | 122 | 112 | 1.1 | 0.7 | 0.11 |
| 60 | 9029  | 122 | 83  | 361  | 117 | 49  | 2.4 | 0.9 | 0.09 |
| 61 | 4279  | 118 | 29  | 278  | 115 | 71  | 1.6 | 0.7 | 0.10 |
| 62 | 6429  | 117 | 59  | 297  | 115 | 96  | 1.2 | 0.9 | 0.11 |
| 63 | 8108  | 114 | 79  | 335  | 119 | 77  | 1.6 | 0.9 | 0.15 |
| 64 | 4832  | 113 | 35  | 330  | 114 | 77  | 1.5 | 0.6 | 0.04 |
| 65 | 5364  | 103 | 59  | 323  | 99  | 67  | 1.5 | 0.6 | 0.13 |
| 66 | 5262  | 97  | 63  | 258  | 90  | 47  | 1.9 | 1.0 | 0.05 |
| 67 | 3808  | 90  | 42  | 225  | 82  | 32  | 2.6 | 0.9 | 0.12 |
| 68 | 1925  | 82  | 23  | 187  | 89  | 45  | 2.0 | 0.7 | 0.06 |
| 69 | 3010  | 82  | 35  | 217  | 81  | 45  | 1.8 | 0.8 | 0.12 |
| 70 | 2764  | 79  | 41  | 202  | 68  | 36  | 1.9 | 0.9 | 0.11 |
| 71 | 2211  | 68  | 42  | 167  | 61  | 43  | 1.4 | 1.0 |      |
| 72 | 2334  | 61  | 42  | 166  | 42  | 25  | 1.7 | 1.0 |      |
| 73 | 22327 | 340 | 68  | 1182 | 345 | 160 | 2.2 | 0.2 | 0.22 |
| 74 | 14019 | 253 | 65  | 714  | 251 | 118 | 2.1 | 0.3 | 0.08 |
| 75 | 17076 | 232 | 76  | 632  | 230 | 133 | 1.7 | 0.5 | 0.10 |
| 76 | 19293 | 226 | 60  | 929  | 239 | 166 | 1.4 | 0.3 | 0.18 |
| 77 | 14743 | 196 | 73  | 651  | 205 | 145 | 1.4 | 0.4 | 0.12 |
| 78 | 9675  | 166 | 44  | 549  | 170 | 88  | 1.9 | 0.4 | 0.08 |
| 79 | 5700  | 164 | 32  | 420  | 165 | 62  | 2.7 | 0.4 | 0.13 |
| 80 | 7871  | 153 | 53  | 427  | 156 | 94  | 1.7 | 0.5 | 0.11 |
| 81 | 5022  | 149 | 27  | 429  | 146 | 68  | 2.1 | 0.3 | 0.11 |
| 82 | 7285  | 146 | 55  | 376  | 145 | 67  | 2.2 | 0.6 | 0.10 |
| 83 | 8928  | 143 | 82  | 407  | 143 | 103 | 1.4 | 0.7 | 0.18 |
| 84 | 7952  | 140 | 61  | 385  | 141 | 103 | 1.4 | 0.7 | 0.06 |
| 85 | 9388  | 138 | 76  | 412  | 129 | 113 | 1.1 | 0.7 | 0.09 |
| 86 | 3355  | 134 | 49  | 363  | 139 | 86  | 1.6 | 0.3 |      |

|            |       |     |     |     |     |     |     |     |      |
|------------|-------|-----|-----|-----|-----|-----|-----|-----|------|
| <b>87</b>  | 9147  | 131 | 55  | 401 | 133 | 99  | 1.3 | 0.7 | 0.12 |
| <b>88</b>  | 6872  | 123 | 62  | 358 | 141 | 84  | 1.7 | 0.7 | 0.15 |
| <b>89</b>  | 4539  | 118 | 41  | 303 | 125 | 55  | 2.3 | 0.6 | 0.05 |
| <b>90</b>  | 6377  | 118 | 44  | 356 | 140 | 72  | 1.9 | 0.6 | 0.06 |
| <b>91</b>  | 5860  | 115 | 56  | 308 | 119 | 68  | 1.8 | 0.8 | 0.06 |
| <b>92</b>  | 5010  | 114 | 44  | 298 | 113 | 66  | 1.7 | 0.7 | 0.09 |
| <b>93</b>  | 4987  | 113 | 37  | 322 | 118 | 68  | 1.7 | 0.6 | 0.06 |
| <b>94</b>  | 4746  | 113 | 47  | 267 | 113 | 52  | 2.2 | 0.8 | 0.07 |
| <b>95</b>  | 4137  | 110 | 41  | 258 | 112 | 46  | 2.4 | 0.8 | 0.07 |
| <b>96</b>  | 3194  | 109 | 27  | 256 | 108 | 43  | 2.5 | 0.6 |      |
| <b>97</b>  | 5619  | 101 | 43  | 369 | 123 | 89  | 1.4 | 0.5 | 0.09 |
| <b>98</b>  | 3206  | 92  | 38  | 238 | 95  | 53  | 1.8 | 0.7 |      |
| <b>99</b>  | 3321  | 88  | 42  | 210 | 88  | 44  | 2.0 | 0.9 |      |
| <b>100</b> | 3355  | 86  | 41  | 226 | 90  | 51  | 1.8 | 0.8 | 0.09 |
| <b>101</b> | 3286  | 86  | 37  | 227 | 84  | 47  | 1.8 | 0.8 |      |
| <b>102</b> | 3424  | 82  | 48  | 214 | 83  | 52  | 1.6 | 0.9 | 0.09 |
| <b>103</b> | 3194  | 82  | 43  | 252 | 91  | 62  | 1.5 | 0.6 |      |
| <b>104</b> | 2689  | 77  | 32  | 198 | 79  | 47  | 1.7 | 0.9 |      |
| <b>105</b> | 1298  | 70  | 29  | 191 | 79  | 28  | 2.8 | 0.4 |      |
| <b>106</b> | 1517  | 67  | 24  | 152 | 67  | 26  | 2.5 | 0.8 |      |
| <b>107</b> | 3172  | 64  | 54  | 195 | 65  | 57  | 1.1 | 1.0 | 0.05 |
| <b>108</b> | 2022  | 60  | 39  | 160 | 62  | 41  | 1.5 | 1.0 |      |
| <b>109</b> | 1816  | 59  | 31  | 153 | 58  | 34  | 1.7 | 1.0 | 0.06 |
| <b>110</b> | 1505  | 56  | 31  | 140 | 57  | 31  | 1.9 | 1.0 |      |
| <b>111</b> | 1264  | 53  | 24  | 128 | 53  | 26  | 2.0 | 1.0 |      |
| <b>112</b> | 931   | 37  | 27  | 105 | 38  | 29  | 1.3 | 1.0 | 0.03 |
| <b>113</b> | 770   | 31  | 26  | 89  | 32  | 26  | 1.2 | 1.0 |      |
| <b>114</b> | 28368 | 246 | 129 | 646 | 250 | 159 | 1.6 | 0.9 |      |
| <b>115</b> | 16701 | 216 | 99  | 777 | 258 | 164 | 1.6 | 0.3 |      |
| <b>116</b> | 7006  | 204 | 41  | 455 | 204 | 59  | 3.4 | 0.4 |      |
| <b>117</b> | 14928 | 187 | 79  | 539 | 188 | 134 | 1.4 | 0.6 | 0.15 |
| <b>118</b> | 17244 | 185 | 98  | 545 | 198 | 125 | 1.6 | 0.7 |      |
| <b>119</b> | 7464  | 169 | 55  | 390 | 171 | 62  | 2.7 | 0.6 |      |
| <b>120</b> | 8264  | 155 | 56  | 369 | 158 | 65  | 2.4 | 0.8 | 0.13 |
| <b>121</b> | 10924 | 153 | 70  | 510 | 158 | 118 | 1.3 | 0.5 | 0.09 |
| <b>122</b> | 6949  | 151 | 48  | 370 | 154 | 68  | 2.3 | 0.6 | 0.09 |
| <b>123</b> | 8179  | 136 | 79  | 335 | 137 | 84  | 1.6 | 0.9 | 0.12 |
| <b>124</b> | 6034  | 135 | 54  | 316 | 135 | 57  | 2.4 | 0.8 | 0.08 |
| <b>125</b> | 7864  | 129 | 61  | 392 | 139 | 96  | 1.4 | 0.6 | 0.10 |
| <b>126</b> | 4804  | 129 | 33  | 307 | 131 | 54  | 2.4 | 0.6 | 0.09 |
| <b>127</b> | 5433  | 127 | 49  | 309 | 130 | 59  | 2.2 | 0.7 |      |
| <b>128</b> | 6835  | 125 | 65  | 319 | 131 | 68  | 1.9 | 0.8 |      |
| <b>129</b> | 8007  | 124 | 74  | 335 | 131 | 87  | 1.5 | 0.9 | 0.08 |
| <b>130</b> | 8036  | 123 | 70  | 341 | 122 | 86  | 1.4 | 0.9 | 0.09 |
| <b>131</b> | 4232  | 123 | 34  | 370 | 125 | 59  | 2.1 | 0.4 | 0.08 |
| <b>132</b> | 6348  | 122 | 61  | 306 | 131 | 63  | 2.1 | 0.9 |      |

|     |       |     |     |     |     |     |     |     |      |
|-----|-------|-----|-----|-----|-----|-----|-----|-----|------|
| 133 | 5920  | 121 | 49  | 316 | 121 | 65  | 1.9 | 0.7 | 0.09 |
| 134 | 3946  | 116 | 34  | 265 | 120 | 38  | 3.1 | 0.7 |      |
| 135 | 6920  | 115 | 67  | 320 | 120 | 90  | 1.3 | 0.8 |      |
| 136 | 5062  | 115 | 43  | 288 | 115 | 52  | 2.2 | 0.8 | 0.08 |
| 137 | 6091  | 112 | 57  | 294 | 117 | 62  | 1.9 | 0.9 | 0.06 |
| 138 | 7836  | 110 | 65  | 376 | 119 | 107 | 1.1 | 0.7 | 0.06 |
| 139 | 7778  | 108 | 70  | 331 | 108 | 92  | 1.2 | 0.9 |      |
| 140 | 4947  | 107 | 48  | 282 | 117 | 59  | 2.0 | 0.8 |      |
| 141 | 3317  | 105 | 34  | 231 | 105 | 39  | 2.7 | 0.8 | 0.06 |
| 142 | 7550  | 104 | 80  | 305 | 103 | 89  | 1.2 | 1.0 |      |
| 143 | 4232  | 103 | 42  | 253 | 105 | 44  | 2.4 | 0.8 | 0.07 |
| 144 | 3460  | 103 | 48  | 252 | 108 | 43  | 2.5 | 0.7 |      |
| 145 | 5176  | 103 | 55  | 270 | 106 | 57  | 1.9 | 0.9 |      |
| 146 | 5062  | 102 | 50  | 285 | 109 | 64  | 1.7 | 0.8 |      |
| 147 | 4461  | 98  | 48  | 238 | 100 | 54  | 1.8 | 1.0 | 0.13 |
| 148 | 6205  | 95  | 61  | 329 | 114 | 91  | 1.2 | 0.7 |      |
| 149 | 3718  | 92  | 43  | 244 | 91  | 49  | 1.9 | 0.8 |      |
| 150 | 3088  | 92  | 37  | 210 | 91  | 43  | 2.1 | 0.9 |      |
| 151 | 2088  | 91  | 17  | 203 | 91  | 27  | 3.4 | 0.6 |      |
| 152 | 3088  | 86  | 36  | 232 | 92  | 49  | 1.9 | 0.7 |      |
| 153 | 4432  | 85  | 57  | 237 | 84  | 68  | 1.2 | 1.0 | 0.09 |
| 154 | 3632  | 84  | 48  | 213 | 82  | 55  | 1.5 | 1.0 |      |
| 155 | 2888  | 79  | 45  | 192 | 85  | 44  | 1.9 | 1.0 | 0.09 |
| 156 | 2745  | 79  | 34  | 193 | 81  | 38  | 2.2 | 0.9 | 0.06 |
| 157 | 3203  | 77  | 53  | 205 | 79  | 49  | 1.6 | 1.0 | 0.09 |
| 158 | 2145  | 77  | 27  | 185 | 77  | 31  | 2.5 | 0.8 |      |
| 159 | 3603  | 76  | 56  | 207 | 76  | 57  | 1.3 | 1.0 |      |
| 160 | 3546  | 76  | 53  | 203 | 79  | 55  | 1.4 | 1.0 |      |
| 161 | 1344  | 68  | 21  | 150 | 68  | 21  | 3.2 | 0.7 | 0.07 |
| 162 | 1945  | 68  | 34  | 175 | 71  | 30  | 2.4 | 0.8 | 0.05 |
| 163 | 2517  | 65  | 42  | 169 | 65  | 44  | 1.5 | 1.0 |      |
| 164 | 1716  | 65  | 21  | 155 | 64  | 22  | 2.9 | 0.9 | 0.05 |
| 165 | 2574  | 64  | 43  | 169 | 65  | 44  | 1.5 | 1.0 | 0.08 |
| 166 | 2717  | 63  | 43  | 175 | 69  | 46  | 1.5 | 1.0 | 0.11 |
| 167 | 2374  | 61  | 38  | 167 | 64  | 38  | 1.7 | 1.0 | 0.08 |
| 168 | 2231  | 61  | 55  | 155 | 60  | 39  | 1.5 | 1.0 |      |
| 169 | 2459  | 60  | 45  | 163 | 62  | 44  | 1.4 | 1.0 |      |
| 170 | 2459  | 58  | 46  | 162 | 59  | 47  | 1.2 | 1.0 |      |
| 171 | 2088  | 50  | 41  | 147 | 53  | 46  | 1.2 | 1.0 | 0.08 |
| 172 | 1458  | 45  | 29  | 122 | 53  | 31  | 1.7 | 1.0 | 0.04 |
| 173 | 7305  | 163 | 77  | 425 | 161 | 111 | 1.5 | 0.5 | 0.13 |
| 174 | 7709  | 149 | 60  | 350 | 148 | 71  | 2.1 | 0.8 | 0.15 |
| 175 | 13910 | 149 | 115 | 418 | 151 | 121 | 1.2 | 1.0 |      |
| 176 | 8410  | 130 | 65  | 378 | 122 | 106 | 1.1 | 0.7 |      |
| 177 | 4821  | 127 | 31  | 298 | 127 | 45  | 2.8 | 0.7 | 0.09 |
| 178 | 5160  | 117 | 51  | 286 | 122 | 60  | 2.0 | 0.8 | 0.06 |

|            |      |     |    |     |     |    |     |     |      |
|------------|------|-----|----|-----|-----|----|-----|-----|------|
| <b>179</b> | 4821 | 113 | 42 | 298 | 122 | 51 | 2.4 | 0.7 | 0.13 |
| <b>180</b> | 5564 | 102 | 58 | 322 | 109 | 83 | 1.3 | 0.7 | 0.10 |
| <b>181</b> | 6031 | 102 | 46 | 332 | 96  | 95 | 1.0 | 0.7 | 0.08 |
| <b>182</b> | 3398 | 101 | 37 | 249 | 100 | 45 | 2.2 | 0.7 | 0.09 |
| <b>183</b> | 3334 | 99  | 23 | 257 | 101 | 49 | 2.1 | 0.6 | 0.09 |
| <b>184</b> | 2846 | 89  | 31 | 213 | 89  | 39 | 2.3 | 0.8 | 0.06 |
| <b>185</b> | 1975 | 85  | 23 | 193 | 85  | 27 | 3.2 | 0.7 | 0.06 |
| <b>186</b> | 3462 | 82  | 50 | 207 | 82  | 49 | 1.7 | 1.0 | 0.05 |
| <b>187</b> | 2739 | 74  | 41 | 186 | 76  | 41 | 1.9 | 1.0 | 0.09 |
| <b>188</b> | 2803 | 74  | 34 | 201 | 75  | 55 | 1.4 | 0.9 | 0.09 |
| <b>189</b> | 2145 | 72  | 32 | 171 | 71  | 37 | 1.9 | 0.9 | 0.10 |
| <b>190</b> | 2251 | 70  | 37 | 172 | 71  | 40 | 1.8 | 1.0 | 0.06 |
| <b>191</b> | 2017 | 68  | 33 | 165 | 73  | 35 | 2.0 | 0.9 | 0.07 |
| <b>192</b> | 2336 | 68  | 34 | 172 | 68  | 41 | 1.7 | 1.0 | 0.06 |
| <b>193</b> | 1656 | 66  | 23 | 158 | 69  | 27 | 2.6 | 0.8 | 0.04 |
| <b>194</b> | 1975 | 65  | 33 | 165 | 66  | 36 | 1.8 | 0.9 | 0.11 |
| <b>195</b> | 2591 | 63  | 42 | 173 | 66  | 47 | 1.4 | 1.0 | 0.06 |
| <b>196</b> | 2400 | 53  | 46 | 159 | 58  | 47 | 1.2 | 1.0 | 0.07 |
| <b>197</b> | 1189 | 53  | 28 | 127 | 55  | 24 | 2.3 | 0.9 | 0.05 |
| <b>198</b> | 1699 | 52  | 37 | 143 | 56  | 34 | 1.6 | 1.0 | 0.05 |
| <b>199</b> | 1784 | 52  | 36 | 142 | 52  | 40 | 1.3 | 1.0 | 0.06 |
| <b>200</b> | 2039 | 52  | 41 | 152 | 51  | 46 | 1.1 | 1.0 | 0.07 |
| <b>201</b> | 1975 | 51  | 46 | 145 | 51  | 45 | 1.1 | 1.0 | 0.03 |
| <b>202</b> | 1911 | 50  | 42 | 146 | 51  | 43 | 1.2 | 1.0 | 0.05 |
| <b>203</b> | 765  | 34  | 28 | 84  | 28  | 23 | 1.2 | 1.0 | 0.06 |
| <b>204</b> | 1041 | 32  | 28 | 106 | 34  | 30 | 1.2 | 1.0 | 0.05 |
| <b>205</b> | 1967 | 100 | 31 | 238 | 107 | 32 | 3.4 | 0.4 |      |
| <b>206</b> | 2418 | 92  | 27 | 230 | 92  | 35 | 2.6 | 0.6 | 0.13 |
| <b>207</b> | 1530 | 87  | 23 | 187 | 87  | 21 | 4.1 | 0.6 | 0.08 |
| <b>208</b> | 2943 | 72  | 48 | 189 | 73  | 51 | 1.4 | 1.0 | 0.09 |
| <b>209</b> | 874  | 60  | 8  | 143 | 61  | 23 | 2.7 | 0.5 | 0.06 |
| <b>210</b> | 1107 | 52  | 41 | 127 | 57  | 24 | 2.3 | 0.9 | 0.08 |
| <b>211</b> | 539  | 50  | 24 | 104 | 52  | 15 | 3.5 | 0.6 | 0.09 |
| <b>212</b> | 1530 | 49  | 34 | 134 | 48  | 41 | 1.2 | 1.0 | 0.08 |
| <b>213</b> | 1369 | 48  | 30 | 128 | 50  | 33 | 1.5 | 1.0 | 0.09 |
| <b>214</b> | 830  | 43  | 23 | 107 | 43  | 20 | 2.2 | 0.9 | 0.04 |
| <b>215</b> | 1326 | 42  | 35 | 126 | 43  | 35 | 1.2 | 1.0 | 0.09 |
| <b>216</b> | 874  | 41  | 19 | 102 | 44  | 22 | 2.0 | 1.0 | 0.03 |
| <b>217</b> | 860  | 41  | 36 | 104 | 43  | 25 | 1.8 | 1.0 | 0.05 |
| <b>218</b> | 554  | 41  | 14 | 96  | 48  | 15 | 3.2 | 0.8 | 0.04 |
| <b>219</b> | 1151 | 41  | 28 | 117 | 44  | 31 | 1.4 | 1.0 | 0.04 |
| <b>220</b> | 787  | 39  | 21 | 99  | 38  | 20 | 1.9 | 1.0 | 0.05 |
| <b>221</b> | 685  | 39  | 21 | 90  | 39  | 21 | 1.9 | 1.0 | 0.05 |
| <b>222</b> | 1209 | 38  | 34 | 121 | 43  | 38 | 1.1 | 1.0 | 0.08 |
| <b>223</b> | 626  | 38  | 12 | 92  | 41  | 16 | 2.5 | 0.9 | 0.09 |
| <b>224</b> | 248  | 36  | 9  | 66  | 31  | 7  | 4.2 | 0.7 | 0.08 |



|            |     |    |    |     |    |    |     |     |      |
|------------|-----|----|----|-----|----|----|-----|-----|------|
| <b>225</b> | 510 | 33 | 20 | 73  | 31 | 18 | 1.7 | 1.0 | 0.05 |
| <b>226</b> | 495 | 32 | 19 | 74  | 27 | 16 | 1.7 | 1.0 | 0.06 |
| <b>227</b> | 466 | 32 | 19 | 71  | 30 | 17 | 1.8 | 1.0 | 0.07 |
| <b>228</b> | 539 | 31 | 22 | 76  | 29 | 21 | 1.4 | 1.0 | 0.08 |
| <b>229</b> | 918 | 31 | 27 | 96  | 35 | 30 | 1.2 | 1.0 | 0.03 |
| <b>230</b> | 830 | 31 | 26 | 92  | 33 | 25 | 1.3 | 1.0 | 0.07 |
| <b>231</b> | 350 | 31 | 14 | 63  | 27 | 11 | 2.5 | 1.0 | 0.06 |
| <b>232</b> | 918 | 31 | 28 | 103 | 36 | 28 | 1.3 | 1.0 | 0.02 |
| <b>233</b> | 568 | 30 | 30 | 77  | 32 | 20 | 1.6 | 1.0 |      |
| <b>234</b> | 524 | 30 | 23 | 79  | 28 | 20 | 1.4 | 1.0 |      |
| <b>235</b> | 422 | 29 | 18 | 66  | 27 | 17 | 1.6 | 1.0 |      |
| <b>236</b> | 466 | 29 | 20 | 72  | 26 | 18 | 1.4 | 1.0 |      |
| <b>237</b> | 495 | 29 | 22 | 74  | 29 | 21 | 1.4 | 1.0 |      |
| <b>238</b> | 335 | 29 | 15 | 54  | 26 | 12 | 2.1 | 1.0 |      |
| <b>239</b> | 262 | 29 | 11 | 54  | 27 | 8  | 3.5 | 1.0 |      |
| <b>240</b> | 277 | 29 | 12 | 49  | 24 | 9  | 2.5 | 1.0 |      |
| <b>241</b> | 262 | 29 | 11 | 50  | 24 | 9  | 2.7 | 1.0 |      |
| <b>242</b> | 335 | 29 | 15 | 60  | 27 | 15 | 1.7 | 1.0 |      |
| <b>243</b> | 554 | 29 | 25 | 76  | 27 | 24 | 1.1 | 1.0 | 0.02 |
| <b>244</b> | 437 | 28 | 20 | 58  | 26 | 18 | 1.4 | 1.0 | 0.04 |
| <b>245</b> | 160 | 27 | 8  | 47  | 22 | 7  | 3.1 | 0.9 |      |
| <b>246</b> | 510 | 27 | 24 | 72  | 26 | 22 | 1.1 | 1.0 | 0.06 |
| <b>247</b> | 350 | 27 | 17 | 60  | 25 | 14 | 1.7 | 1.0 |      |
| <b>248</b> | 670 | 27 | 27 | 80  | 32 | 24 | 1.3 | 1.0 |      |
| <b>249</b> | 350 | 27 | 17 | 59  | 24 | 15 | 1.5 | 1.0 |      |
| <b>250</b> | 160 | 26 | 9  | 48  | 22 | 8  | 2.6 | 0.9 |      |
| <b>251</b> | 291 | 26 | 14 | 52  | 22 | 12 | 1.9 | 1.0 |      |
| <b>252</b> | 320 | 26 | 16 | 52  | 22 | 14 | 1.6 | 1.0 |      |
| <b>253</b> | 320 | 26 | 16 | 54  | 22 | 14 | 1.6 | 1.0 |      |
| <b>254</b> | 160 | 25 | 8  | 38  | 19 | 5  | 4.2 | 1.0 |      |
| <b>255</b> | 219 | 25 | 13 | 48  | 20 | 12 | 1.6 | 1.0 |      |
| <b>256</b> | 233 | 24 | 12 | 43  | 19 | 8  | 2.5 | 1.0 |      |
| <b>257</b> | 364 | 24 | 20 | 62  | 22 | 19 | 1.2 | 1.0 |      |
| <b>258</b> | 204 | 23 | 11 | 44  | 20 | 9  | 2.2 | 1.0 |      |
| <b>259</b> | 291 | 23 | 16 | 50  | 19 | 11 | 1.7 | 1.0 |      |
| <b>260</b> | 262 | 23 | 14 | 45  | 19 | 11 | 1.7 | 1.0 |      |
| <b>261</b> | 262 | 23 | 15 | 47  | 19 | 11 | 1.7 | 1.0 |      |
| <b>262</b> | 306 | 22 | 17 | 53  | 19 | 15 | 1.3 | 1.0 |      |
| <b>263</b> | 262 | 22 | 15 | 52  | 19 | 14 | 1.4 | 1.0 |      |
| <b>264</b> | 248 | 22 | 15 | 47  | 19 | 12 | 1.6 | 1.0 |      |
| <b>265</b> | 262 | 21 | 15 | 52  | 19 | 14 | 1.4 | 1.0 |      |
| <b>266</b> | 189 | 21 | 12 | 41  | 17 | 9  | 1.8 | 1.0 |      |
| <b>267</b> | 277 | 21 | 16 | 50  | 17 | 14 | 1.3 | 1.0 |      |
| <b>268</b> | 160 | 21 | 10 | 33  | 16 | 8  | 2.0 | 1.0 |      |
| <b>269</b> | 204 | 21 | 12 | 39  | 16 | 9  | 1.8 | 1.0 |      |
| <b>270</b> | 291 | 21 | 18 | 52  | 18 | 16 | 1.2 | 1.0 |      |

---

|            |     |    |    |    |    |    |     |     |
|------------|-----|----|----|----|----|----|-----|-----|
| <b>271</b> | 248 | 21 | 15 | 45 | 16 | 12 | 1.3 | 1.0 |
| <b>272</b> | 219 | 21 | 14 | 39 | 16 | 11 | 1.5 | 1.0 |
| <b>273</b> | 189 | 21 | 12 | 40 | 17 | 10 | 1.7 | 1.0 |
| <b>274</b> | 233 | 20 | 14 | 42 | 17 | 12 | 1.4 | 1.0 |
| <b>275</b> | 160 | 19 | 11 | 34 | 15 | 9  | 1.8 | 1.0 |
| <b>276</b> | 204 | 18 | 14 | 44 | 16 | 11 | 1.5 | 1.0 |
| <b>277</b> | 189 | 18 | 13 | 41 | 16 | 11 | 1.5 | 1.0 |
| <b>278</b> | 204 | 18 | 14 | 37 | 16 | 12 | 1.3 | 1.0 |
| <b>279</b> | 160 | 17 | 12 | 33 | 14 | 9  | 1.6 | 1.0 |
| <b>280</b> | 146 | 17 | 11 | 31 | 13 | 8  | 1.6 | 1.0 |
| <b>281</b> | 175 | 17 | 13 | 38 | 11 | 8  | 1.5 | 1.0 |
| <b>282</b> | 160 | 17 | 12 | 33 | 13 | 9  | 1.4 | 1.0 |
| <b>283</b> | 160 | 17 | 12 | 37 | 13 | 9  | 1.4 | 1.0 |
| <b>284</b> | 204 | 16 | 16 | 39 | 11 | 11 | 1.0 | 1.0 |

---
